# Supplementary material
Source: PubMed Central journal article supplement (PMC9904108)
Supplement: mmc1.pdf [file mmc1.pdf]

## Supplementary Appendix To:

### The Clinical and Genomic Epidemiology of Seasonal Human Coronaviruses in Congregate Homeless Shelter Settings: A Repeated Cross-Sectional Study

Eric J. Chow, MD,<sup>1\*</sup> Amanda M. Casto, MD,<sup>1,2</sup> Julia H. Rogers, MPH,<sup>1,3</sup> Pavitra Roychoudhury, PhD,<sup>2,4</sup> Peter D. Han, MS,<sup>5,6</sup> Hong Xie, MS,<sup>4</sup> Margaret G. Mills, PhD,<sup>4</sup> Tien V. Nguyen, BS,<sup>4</sup> Brian Pfau, BS,<sup>5,6</sup> Sarah N. Cox, MSPH,<sup>1,3</sup> Caitlin R. Wolf, BS,<sup>1</sup> James P. Hughes, PhD,<sup>2,7</sup> Timothy M. Uyeki, MD,<sup>8</sup> Melissa A. Rolfes, PhD,<sup>8</sup> Emily Mosites, PhD,<sup>9</sup> M. Mia Shim, MD,<sup>10,11</sup> Jeffrey S. Duchin, MD,<sup>1,10</sup> Nancy Sugg, MD,<sup>11</sup> Lea A. Starita, PhD,<sup>2,4</sup> Janet A. Englund, MD,<sup>12</sup> Helen Y. Chu, MD<sup>1</sup>

#### Affiliations:

<sup>1</sup>Division of Allergy and Infectious Diseases, Department of Medicine, University of Washington, Seattle, Washington, USA

<sup>2</sup>Vaccine and Infectious Disease Division, Fred Hutchinson Cancer Research Center, Seattle, Washington, USA

<sup>3</sup>Department of Epidemiology, University of Washington, Seattle, Washington, USA

<sup>4</sup>Virology Division, Department of Laboratory Medicine and Pathology, University of Washington, Seattle, Washington, USA

<sup>5</sup>Brotman Baty Institute for Precision Medicine, Seattle, Washington, USA

<sup>6</sup>Department of Genome Sciences, University of Washington, Seattle, Washington, USA

<sup>7</sup>Department of Biostatistics, University of Washington, Seattle, Washington, USA

<sup>8</sup>Influenza Division, National Center for Immunization and Respiratory Diseases, Centers for Disease Control and Prevention, Atlanta, Georgia, USA

<sup>9</sup>Office of the Deputy Director for Infectious Diseases, Centers for Disease Control and Prevention, Atlanta, Georgia, USA

<sup>10</sup>Public Health – Seattle & King County, Seattle, Washington, USA

<sup>11</sup>Department of Medicine, University of Washington, Seattle, Washington, USA

<sup>12</sup>Division of Pediatric Infectious Diseases, Department of Pediatrics, University of Washington, Seattle Children's Research Institute, Seattle, Washington, USA

#### Contents

|                                                                                                                                                    |           |
|----------------------------------------------------------------------------------------------------------------------------------------------------|-----------|
| <b>Supplemental Table 1. Homeless Shelter Study Sites.....</b>                                                                                     | <b>2</b>  |
| <b>Supplemental Table 2. Supplemental Table 2 Custom Arrayed Multi-Viral Pathogen RT-PCR Platform Over the Study Period.....</b>                   | <b>3</b>  |
| <b>Supplemental Table 3 GenBank Accession Numbers for Sequenced Seasonal Human Coronavirus Specimens.....</b>                                      | <b>4</b>  |
| <b>Supplemental Table 4. Respiratory Viral Pathogen Detection Among Homeless Shelter Participants .....</b>                                        | <b>6</b>  |
| <b>Supplemental Table 5. Seasonal Human Coronavirus Encounters by Age Group Among Samples Collected from Homeless Shelter Participants.....</b>    | <b>7</b>  |
| <b>Supplemental Table 6. Seasonal Human Coronavirus Detection by Shelter Site.....</b>                                                             | <b>8</b>  |
| <b>Supplemental Table 7. Shelter Participants with Multiple Seasonal Human Coronavirus Positive Samples.....</b>                                   | <b>9</b>  |
| <b>Supplemental Figure 1. Study Flow Diagram.....</b>                                                                                              | <b>11</b> |
| <b>Supplemental Figure 2. All Encounters by Shelter Type – October 2019 to May 2021.....</b>                                                       | <b>12</b> |
| <b>Supplemental Figure 3. Seasonal Human Coronavirus Cases Among Unique Participants by Shelter Type – October 2019 to May 2021 (n = 90) .....</b> | <b>13</b> |
| <b>Supplemental Figure 4. Phylogenetic Trees of Genomes from Shelter Samples and From GenBank by Seasonal Human Coronavirus Species.....</b>       | <b>14</b> |
| <b>Supplemental Methods.....</b>                                                                                                                   | <b>17</b> |
| <b>References.....</b>                                                                                                                             | <b>20</b> |

**Supplemental Table 1 Homeless Shelter Study Sites**

| Shelter                                             | Type                           | Grouping                         | Sleeping Quarters                              | Notes                                                               |
|-----------------------------------------------------|--------------------------------|----------------------------------|------------------------------------------------|---------------------------------------------------------------------|
| <b>Routine Surveillance and Surge Testing Sites</b> |                                |                                  |                                                |                                                                     |
| A                                                   | Adult female (≥18 years)       | Shelters: Adults ≥18 years old   | Communal bunk beds                             |                                                                     |
| B                                                   | Adult mix gender (≥18 years)   | Shelters: Adults ≥18 years old   | Communal bunk beds                             |                                                                     |
| C                                                   | Adult mix gender (18-25 years) | Shelters: Adults 18-25 years old | Communal floor mats and bunk beds              |                                                                     |
| D                                                   | Family                         | Shelters: Adults and Children    | Private rooms/shared rooms/communal floor mats |                                                                     |
| E                                                   | Family                         | Shelters: Adults and Children    | Private rooms/shared rooms/communal floor mats |                                                                     |
| F                                                   | Adult male (≥18 years)         | Shelters: Adults ≥18 years old   | Communal bunk beds                             |                                                                     |
| G                                                   | Adult mix gender (≥18 years)   | Shelters: Adults ≥18 years old   | Private rooms/shared rooms                     | Routine surveillance began on 4/12/2020 to replace L                |
| H                                                   | Family                         | Shelters: Adults and Children    | Private rooms/shared rooms                     | Routine surveillance began on 4/8/2020 to replace O                 |
| I                                                   | Adult male senior (≥50 years)  | Shelters: Adults ≥ 50 years old  | 5 person dorms                                 | Routine surveillance began on 9/26/2020 to replace M                |
| J                                                   | Adult male (≥18 years)         | Shelters: Adults ≥18 years old   | Individual open cubicles                       | Routine surveillance began on 12/3/2020 to replace F                |
| K                                                   | Adult mix gender (≥18 years)   | Shelters: Adults ≥18 years old   | Individual open cubicles                       | Routine surveillance began on 12/3/2020 to replace F                |
| L                                                   | Adult mix gender (≥18 years)   | Shelters: Adults ≥18 years old   | Communal bunk beds                             | Closed on 4/9/2020 and moved residents to G                         |
| M                                                   | Adult male senior (≥50 years)  | Shelters: Adults ≥ 50 years old  | Communal floor mats                            |                                                                     |
| N                                                   | Family                         | Shelters: Adults and Children    | Private rooms/shared rooms                     | Open for 1 week before shutting down and then moving residents to H |
| O                                                   | Family                         | Shelters: Adults and Children    | Private rooms/shared rooms                     | Closed on 4/6/2020 and moved residents to H                         |
| <b>Surge Testing Site Only</b>                      |                                |                                  |                                                |                                                                     |
| Other A                                             | Adult male senior (≥50 years)  | Shelters: Adults ≥ 50 years old  | Communal floor mats                            |                                                                     |
| Other B                                             | Adult mix gender (≥18 years)   | Shelters: Adults ≥18 years old   | Private apartments                             |                                                                     |
| Other C                                             | Adult male senior (≥50 years)  | Shelters: Adults ≥ 50 years old  | Communal floor mats                            |                                                                     |
| Other D                                             | Adult mix gender (≥18 years)   | Shelters: Adults ≥18 years old   | Private apartments                             |                                                                     |
| Other E                                             | Adult male senior (≥50 years)  | Shelters: Adults ≥ 50 years old  | Communal floor mats                            |                                                                     |
| Other F                                             | Family                         | Shelters: Adults and Children    | Private rooms/shared rooms/communal floor mats |                                                                     |
| Other G                                             | Adolescents (<18 years)        | Shelters: Adults and Children    | Communal bunk beds                             |                                                                     |
| Other H                                             | Adult mix gender (18-25 years) | Shelters: Adults 18-25 years old | Communal bunk beds                             |                                                                     |

**Supplemental Table 2 Custom Arrayed Multi-Viral Pathogen RT-PCR Platform Over the Study Period**

| Dates During Study |            | Influenza   |             |             | Parainfluenza       | Enterovirus |       | Rhinovirus | Adenovirus | Seasonal Human Coronavirus |           |           |           | SARS-CoV-2 | Respiratory Syncytial Virus |      | Metapneumovirus | Human Parechovirus | Human Bocavirus |
|--------------------|------------|-------------|-------------|-------------|---------------------|-------------|-------|------------|------------|----------------------------|-----------|-----------|-----------|------------|-----------------------------|------|-----------------|--------------------|-----------------|
| Date Started       | Date Ended | Influenza A | Influenza B | Influenza C | Parainfluenza (1-4) | Enterovirus | EVD68 | Rhinovirus | Adenovirus | HCoV-HKU-1                 | HCoV-NL63 | HCoV-229E | HCoV-OC43 | SARS-CoV-2 | RSVA                        | RSVB | Metapneumovirus | Human Parechovirus | Human Bocavirus |
| 10/1/19            | 2/20/20    | x           | x           | x           | x                   | x           | x     | x          | x          | x                          |           |           |           |            |                             |      | x               | x                  | x               |
| 2/21/20            | 5/1/20     | x           | x           | x           | x                   | x           | x     | x          | x          | x                          |           |           |           |            |                             |      | x               | x                  | x               |
| 5/29/20            | 11/20/20   | x           | x           | x           | x                   | x           | x     | x          | x          | x                          |           |           |           |            |                             |      | x               | x                  | x               |
| 11/23/20           | 5/31/21    | x           | x           | x           | x                   | x           | x     | x          | x          | x                          | x         | x         | x         | x          | x                           | x    | x               | x                  | x               |

\* From February 25, 2020, onward, samples were tested for SARS-CoV-2 in real-time by a RT-PCR assay. Specimens collected from January 1, 2020-February 25, 2020, were tested retrospectively for SARS-CoV-2. From May 29, 2020 onward, SARS-CoV-2 testing was integrated into the custom arrayed multi-viral pathogen RT-PCR platform.

**Supplemental Table 3 GenBank Accession Numbers for Sequenced Seasonal Human Coronavirus Specimens**

| <b>GenBank Accession Number</b> | <b>Date Collected</b> | <b>Shelter Site Location</b> |
|---------------------------------|-----------------------|------------------------------|
| ON136168                        | 1/17/20               | M                            |
| ON136169                        | 4/8/21                | F                            |
| ON136170                        | 4/13/21               | F                            |
| ON136171                        | 5/22/21               | F                            |
| ON136172                        | 5/19/21               | F                            |
| ON136173                        | 4/15/21               | F                            |
| ON461751                        | 5/28/21               | D                            |
| ON461752                        | 5/28/21               | C                            |
| ON461753                        | 5/31/21               | C                            |
| ON461754                        | 11/2/19               | E                            |
| ON461755                        | 10/21/19              | E                            |
| ON461756                        | 10/29/19              | E                            |
| ON461757                        | 11/4/19               | E                            |
| ON461758                        | 11/7/19               | E                            |
| ON461759                        | 11/9/19               | E                            |
| ON461760                        | 11/11/19              | E                            |
| ON461761                        | 11/25/19              | D                            |
| ON461762                        | 12/2/19               | C                            |
| ON461763                        | 12/4/19               | O                            |
| ON461764                        | 12/11/19              | L                            |
| ON461765                        | 12/20/19              | O                            |
| ON461766                        | 12/20/19              | M                            |
| ON461767                        | 12/23/19              | L                            |
| ON461768                        | 2/10/20               | L                            |
| ON461769                        | 12/27/19              | M                            |
| ON461770                        | 12/27/19              | M                            |
| ON461771                        | 12/28/19              | L                            |
| ON461772                        | 12/30/19              | L                            |
| ON461773                        | 12/31/19              | L                            |
| ON461774                        | 1/3/20                | L                            |
| ON461775                        | 12/30/19              | L                            |
| ON461776                        | 12/31/19              | O                            |
| ON461777                        | 1/4/20                | L                            |
| ON461778                        | 1/6/20                | L                            |
| ON461779                        | 1/15/20               | C                            |
| ON461780                        | 1/16/20               | L                            |
| ON461781                        | 1/16/20               | L                            |

|          |          |   |
|----------|----------|---|
| ON461782 | 12/19/19 | B |
| ON461783 | 12/21/19 | B |
| ON461784 | 12/31/19 | L |
| ON461785 | 1/2/20   | M |
| ON461786 | 1/7/20   | M |
| ON461787 | 1/9/20   | M |
| ON461788 | 1/16/20  | M |
| ON461789 | 1/20/20  | A |
| ON461790 | 1/28/20  | O |
| ON461791 | 4/14/21  | K |
| ON461792 | 2/3/20   | O |
| ON461793 | 2/10/20  | B |
| ON461794 | 10/26/19 | M |
| ON461795 | 1/28/20  | B |
| ON461796 | 4/8/20   | D |
| ON461797 | 5/1/21   | G |
| ON461798 | 5/20/21  | G |

**Supplemental Table 4 Respiratory Viral Pathogen Detection Among Homeless Shelter Participants**

|                                 | Number of Encounters by Pathogen Among Virus-positive Samples | Number of Encounters Where Pathogen Was the Only Virus Detected Among All Virus Positive Samples | Number of Seasonal Human Coronavirus Encounters with Co-detection of Viral Pathogen |
|---------------------------------|---------------------------------------------------------------|--------------------------------------------------------------------------------------------------|-------------------------------------------------------------------------------------|
| <b>Number of Encounters, N</b>  | <b>1,569</b>                                                  | <b>1,569</b>                                                                                     | <b>107</b>                                                                          |
| <b>Pathogen</b>                 | <b>N(%)</b>                                                   | <b>n(%)</b>                                                                                      | <b>n(%)</b>                                                                         |
| Adenovirus                      | 133 (8·5)                                                     | 99 (6·3)                                                                                         | 0                                                                                   |
| Human bocavirus                 | 14 (0·9)                                                      | 6 (0·4)                                                                                          | 0                                                                                   |
| Enterovirus                     | 83 (5·3)                                                      | 61 (3·9)                                                                                         | 1 (0·9)                                                                             |
| Influenza                       |                                                               |                                                                                                  |                                                                                     |
| A                               | 22 (1·4)                                                      | 17 (1·1)                                                                                         | 1 (0·9)                                                                             |
| B                               | 43 (2·7)                                                      | 33 (2·1)                                                                                         | 3 (2·8)                                                                             |
| C                               | 5 (0·3)                                                       | 5 (0·3)                                                                                          | 0                                                                                   |
| Metapneumovirus                 | 14 (0·9)                                                      | 10 (0·6)                                                                                         | 1 (0·9)                                                                             |
| Human parainfluenza virus (1-4) | 32 (2·0)                                                      | 26 (1·7)                                                                                         | 0                                                                                   |
| Human parechovirus              | 3 (0·2)                                                       | 1 (0·1)                                                                                          | 0                                                                                   |
| Rhinovirus                      | 1,066 (67·9)                                                  | 986 (62·8)                                                                                       | 13 (12·2)                                                                           |
| Respiratory syncytial virus     | 20 (1·3)                                                      | 15 (1·0)                                                                                         | 2 (1·9)                                                                             |
| Seasonal human coronavirus      | 107 (6·8)                                                     | 88 (5·6)                                                                                         | -                                                                                   |
| SARS-CoV-2*                     | 133 (10·2)**                                                  | 123 (7·8)                                                                                        | 0                                                                                   |

\*There were n = 22 inconclusive SARS-CoV-2 tests categorized as negative; there were no other pathogens detected in these samples and 17 were asymptomatic

\*\*Among 1300 virus-positive samples in which SARS-CoV-2 testing was performed.

**Supplemental Table 5 Seasonal Human Coronavirus Encounters by Age Group Among Samples Collected from Homeless Shelter Participants**

| Age group, years | All Encounters            | All Seasonal Human Coronavirus Encounters | Percentage |
|------------------|---------------------------|-------------------------------------------|------------|
|                  | N                         | n                                         | %          |
| <5               | 654                       | 6                                         | 0·9        |
| 5-11             | 885                       | 4                                         | 0·5        |
| 12-17            | 506                       | 1                                         | 0·2        |
| 18-49            | 7716                      | 54                                        | 0·7        |
| 50-64            | 3795                      | 35                                        | 0·9        |
| ≥65              | 908                       | 7                                         | 0·8        |
| Age group, years | Viral Positive Encounters | All Seasonal Human Coronavirus Encounters | Percentage |
|                  | N                         | n                                         | %          |
| <5               | 223                       | 6                                         | 2·7        |
| 5-11             | 188                       | 4                                         | 2·1        |
| 12-17            | 64                        | 1                                         | 1·6        |
| 18-49            | 708                       | 54                                        | 7·6        |
| 50-64            | 322                       | 35                                        | 10·9       |
| ≥65              | 64                        | 7                                         | 10·9       |

**Supplemental Table 6 Seasonal Human Coronavirus Detection by Shelter Sites<sup>1</sup>**

| Type of Shelter                      | Number of Total Encounters | Number of Encounters with Viral Pathogen Detection | Seasonal Human Coronavirus Encounters Out of Total Encounters | Seasonal Human Coronavirus Encounters Out of Encounters with Viral Pathogen Detection |
|--------------------------------------|----------------------------|----------------------------------------------------|---------------------------------------------------------------|---------------------------------------------------------------------------------------|
| N                                    | 14,464                     | 1,569                                              | 107                                                           | 107                                                                                   |
| <b>Surveillance Testing</b>          | N                          | n (%)                                              | n (%)                                                         | n (%)                                                                                 |
| Shelters: Adults and Children        | 4761                       | 756 (15.9)                                         | 29 (0.6)                                                      | 29 (3.8)                                                                              |
| Shelters: Adults $\geq$ 18 years old | 6241                       | 467 (7.5)                                          | 53 (0.9)                                                      | 53 (11.4)                                                                             |
| Shelters: Adults 18-25 years old     | 1179                       | 120 (10.2)                                         | 6 (0.5)                                                       | 6 (5.0)                                                                               |
| Shelters: Adults $\geq$ 50 years old | 849                        | 103 (12.1)                                         | 18 (2.1)                                                      | 18 (17.5)                                                                             |
| <b>Surge Testing</b>                 |                            |                                                    |                                                               |                                                                                       |
| Shelters: Adults and Children        | 318                        | 30 (9.4)                                           | 0                                                             | 0                                                                                     |
| Shelters: Adults $\geq$ 18 years old | 704                        | 39 (5.5)                                           | 0                                                             | 0                                                                                     |
| Shelters: Adults 18-25 years old     | 143                        | 11 (7.7)                                           | 0                                                             | 0                                                                                     |
| Shelters: Adults $\geq$ 50 years old | 269                        | 43 (16.0)                                          | 1 (0.4)                                                       | 1 (2.3)                                                                               |

<sup>1</sup>Percentages listed here are row percentages

<sup>2</sup>Among n = 18 seasonal human coronavirus positive encounters in shelters for older adults ( $\geq$ 50 years), there were 17 unique participants with samples collected from October 2019 through February 2020.



**Supplemental Table 7 Shelter Participants with Multiple Seasonal Human Coronavirus Positive Samples**

| Participant | Infection Course | Total Days of Detection Within Same Infection Course* | Encounter Date | Seasonal Human Coronavirus Detected? | Seasonal Human Coronavirus Species | OpenArray Relative Cycle Threshold Value | Time Between Different Infections** |
|-------------|------------------|-------------------------------------------------------|----------------|--------------------------------------|------------------------------------|------------------------------------------|-------------------------------------|
| A           | 1                | 1 day                                                 | 11/26/2019     | No                                   |                                    |                                          | 42 days                             |
|             |                  |                                                       | 12/19/2019     | Yes                                  | HCoV-NL63                          | 26.5                                     |                                     |
|             |                  |                                                       | 1/14/2020      | No                                   |                                    |                                          |                                     |
|             | 2                | 8 days                                                | 1/28/2020      | No                                   |                                    |                                          |                                     |
|             |                  |                                                       | 1/29/2020      | Yes                                  | HCoV-HKU1***                       | 24.3                                     |                                     |
|             |                  |                                                       | 2/5/2020       | Yes                                  | HCoV-HKU1***                       | 25.7                                     |                                     |
| 2/6/2020    | No               |                                                       |                |                                      |                                    |                                          |                                     |
| B           | 1                | 1 day                                                 | 10/12/2019     | No                                   |                                    |                                          | 142 days                            |
|             |                  |                                                       | 11/2/2019      | Yes                                  | HCoV-229E                          | 17.8                                     |                                     |
|             |                  |                                                       | 12/19/2019     | No                                   |                                    |                                          |                                     |
|             | 2                | 1 day                                                 | 12/27/2019     | No                                   |                                    |                                          |                                     |
|             |                  |                                                       | 3/23/2020      | Yes                                  | HCoV-NL63                          | 26.4                                     |                                     |
|             |                  |                                                       | 4/10/2020      | No                                   |                                    |                                          |                                     |
| C           | 1                | 20 days                                               | 1/20/2020      | No                                   |                                    |                                          | -                                   |
|             |                  |                                                       | 1/29/2020      | Yes                                  | HCoV-NL63                          | 19.8                                     |                                     |
|             |                  |                                                       | 2/17/2020      | Yes                                  | HCoV-NL63                          | 23.5                                     |                                     |
|             |                  |                                                       | 2/22/2020      | No                                   |                                    |                                          |                                     |
| D           | 1                | 6 days                                                | 4/6/2021       | No                                   |                                    |                                          | -                                   |
|             |                  |                                                       | 4/15/2021      | Yes                                  | HCoV-HKU1***                       | 14.3                                     |                                     |
|             |                  |                                                       | 4/20/2021      | Yes                                  | HCoV-HKU1***                       | 27.6                                     |                                     |
|             |                  |                                                       | 4/22/2021      | No                                   |                                    |                                          |                                     |
| E           | 1                | 6 days                                                | 4/3/2021       | No                                   |                                    |                                          | -                                   |
|             |                  |                                                       | 4/8/2021       | Yes                                  | HCoV-HKU1A                         | 10.4                                     |                                     |
|             |                  |                                                       | 4/13/2021      | Yes                                  | HCoV-HKU1A                         | 20.3                                     |                                     |
|             |                  |                                                       | 4/24/2021      | Yes                                  | HCoV-HKU1***                       | 27.2                                     |                                     |
|             |                  |                                                       | 4/29/2021      | No                                   |                                    |                                          |                                     |
| F           | 1                | 1 day                                                 | 4/8/2020       | Yes                                  | HCoV-OC43                          | 18.7                                     | 415 days                            |
|             |                  |                                                       | 9/9/2020       | No                                   |                                    |                                          |                                     |
|             | 2                | 1 day                                                 | 12/3/2020      | No                                   |                                    |                                          |                                     |
|             |                  |                                                       | 5/28/2021      | Yes                                  | HCoV-229E                          | 12.6                                     |                                     |
| G           | 1                | 4 days                                                | 5/19/2021      | No                                   |                                    |                                          | -                                   |
|             |                  |                                                       | 5/28/2021      | Yes                                  | HCoV-229E                          | 10.6                                     |                                     |
|             |                  |                                                       | 5/31/2021      | Yes                                  | HCoV-229E                          | 21.1                                     |                                     |
| H           | 1                | 6 days/1 day                                          | 12/16/2019     | No                                   |                                    |                                          | 5 days                              |
|             |                  |                                                       | 12/23/2019     | Yes                                  | HCoV-HKU1B                         | 21.5                                     |                                     |

|   |   |        |            |     |                        |      |         |         |
|---|---|--------|------------|-----|------------------------|------|---------|---------|
|   |   |        | 12/28/2019 | Yes | HCoV-HKU1***/HCoV-NL63 | 22·3 |         |         |
|   |   |        | 1/16/2020  | No  |                        |      |         |         |
|   | 2 | 1 day  | 1/27/2020  | No  |                        |      |         | 49 days |
|   |   |        | 2/10/2020  | Yes | HCoV-HKU1B             | 16·5 |         |         |
| I | 1 | 4 days | 4/16/2020  | No  |                        |      |         |         |
|   |   |        | 12/12/2019 | No  |                        |      |         |         |
|   |   |        | 12/20/2019 | Yes | HCoV-HKU1***           | 15·4 |         |         |
|   |   |        | 12/23/2019 | Yes | HCoV-HKU1***           | 25·4 |         |         |
| J | 1 | 3 days | 1/29/2020  | No  |                        |      | 40 days |         |
|   |   |        | 12/17/2019 | No  |                        |      |         |         |
|   |   |        | 12/19/2019 | Yes | HCoV-NL63              | 17·8 |         |         |
|   |   |        | 12/21/2019 | Yes | HCoV-NL63              | 15   |         |         |
|   | 2 | 1 day  | 12/30/2019 | No  |                        |      |         |         |
|   |   |        | 1/8/2020   | No  |                        |      |         |         |
| K | 1 | 7 days | 1/28/2020  | Yes | HCoV-OC43              | 11·9 |         |         |
|   |   |        | 2/7/2020   | No  |                        |      |         |         |
|   |   |        | 12/26/2019 | No  |                        |      |         |         |
|   |   |        | 12/28/2019 | Yes | HCoV-HKU1B             | 11·9 |         |         |
|   |   |        | 12/30/2019 | Yes | HCoV-HKU1B             | 15·7 |         |         |
|   |   |        | 12/31/2019 | Yes | HCoV-HKU1B             | 17·7 |         |         |
|   |   |        | 1/3/2020   | Yes | HCoV-HKU1B             | 19·3 |         |         |
|   |   |        | 1/4/2020   | No  |                        |      |         |         |

\*Total days of seasonal human coronavirus detection over same infection course calculated as the number of days of detection from the first day of detection to the last day of detection

\*\*Time between different infections was calculated as the number of days between the date of first detection of the first seasonal human coronavirus infection and the date of first detection of the second seasonal coronavirus infection

\*\*\*Unable to determine sub-type of HCoV-HKU1 infection

Supplemental Figure 1. Study Flow Diagram

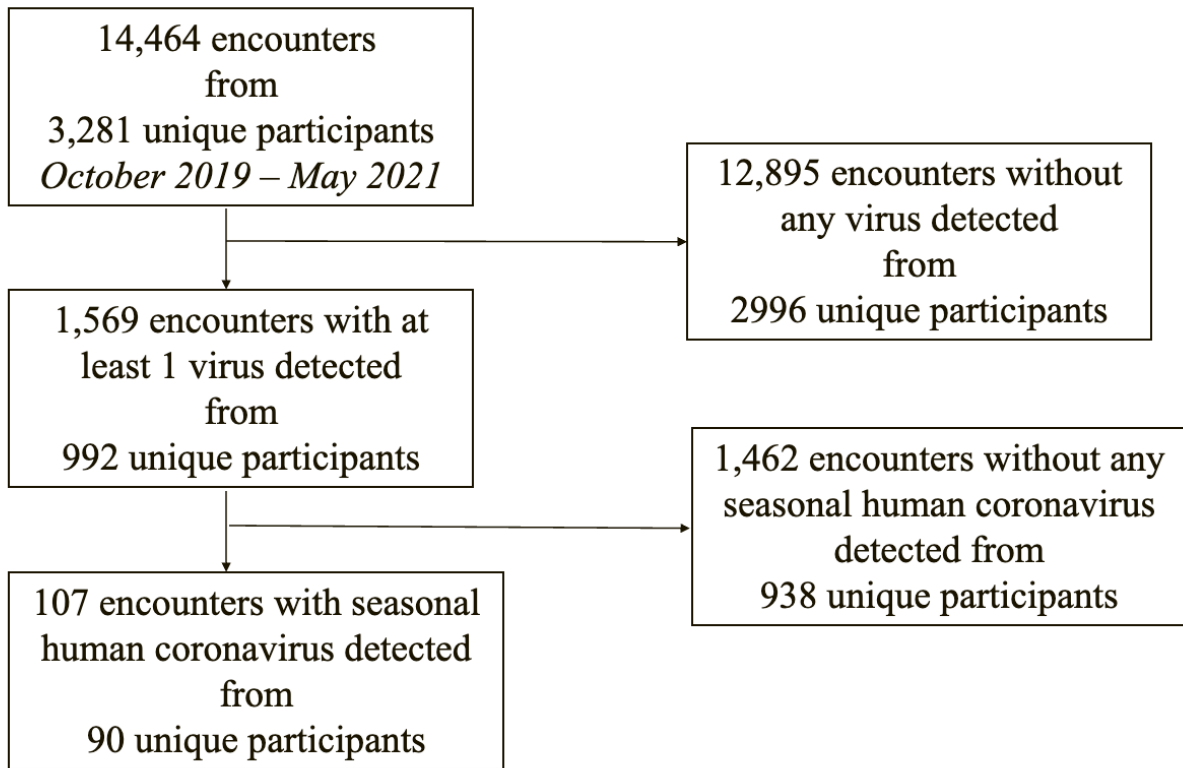

**Supplemental Figure 2 All Encounters by Shelter Type – October 2019 to May 2021**

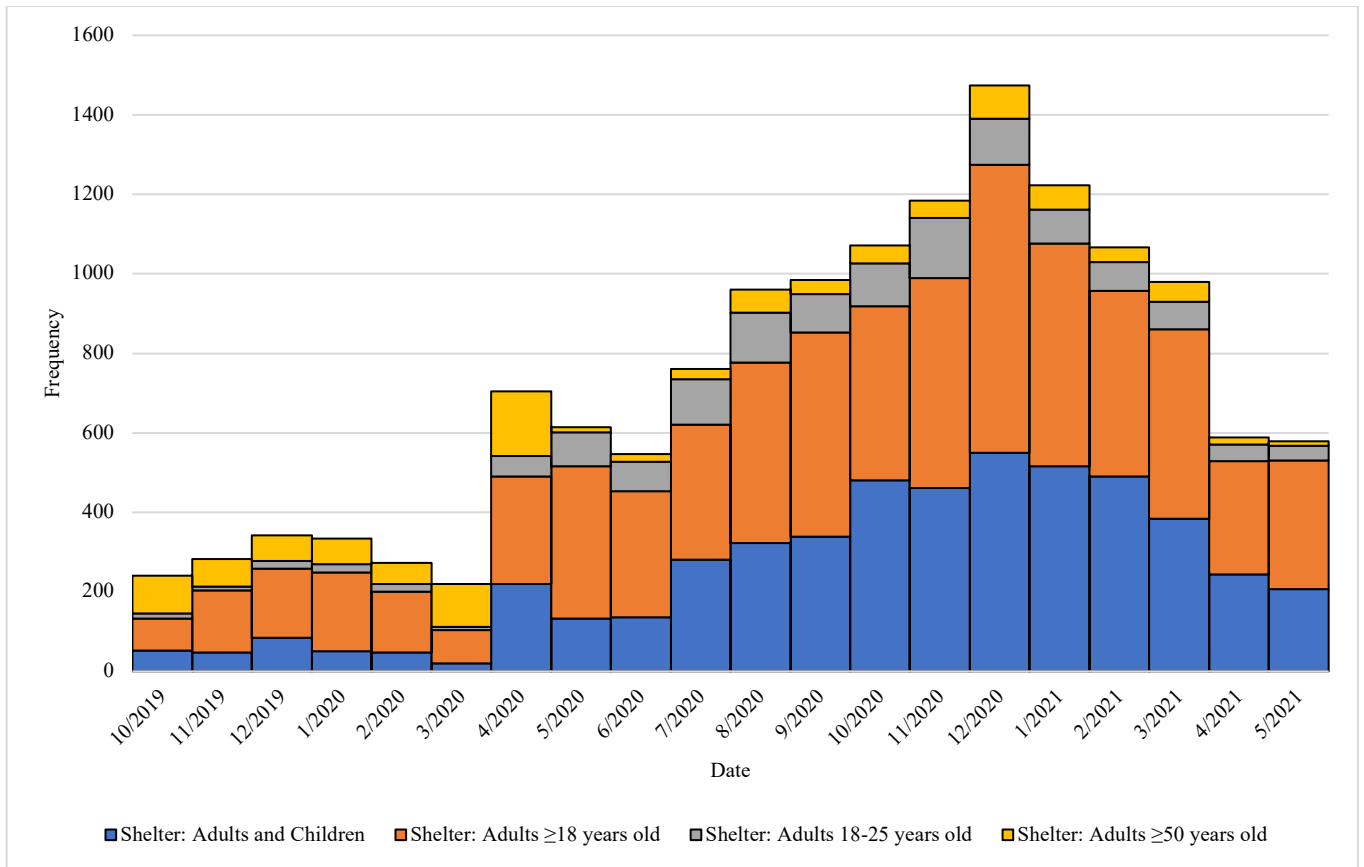

**Supplemental Figure 3. Seasonal Human Coronavirus Cases Among Unique Participants by Shelter Type – October 2019 to May 2021 (n = 90)**

?

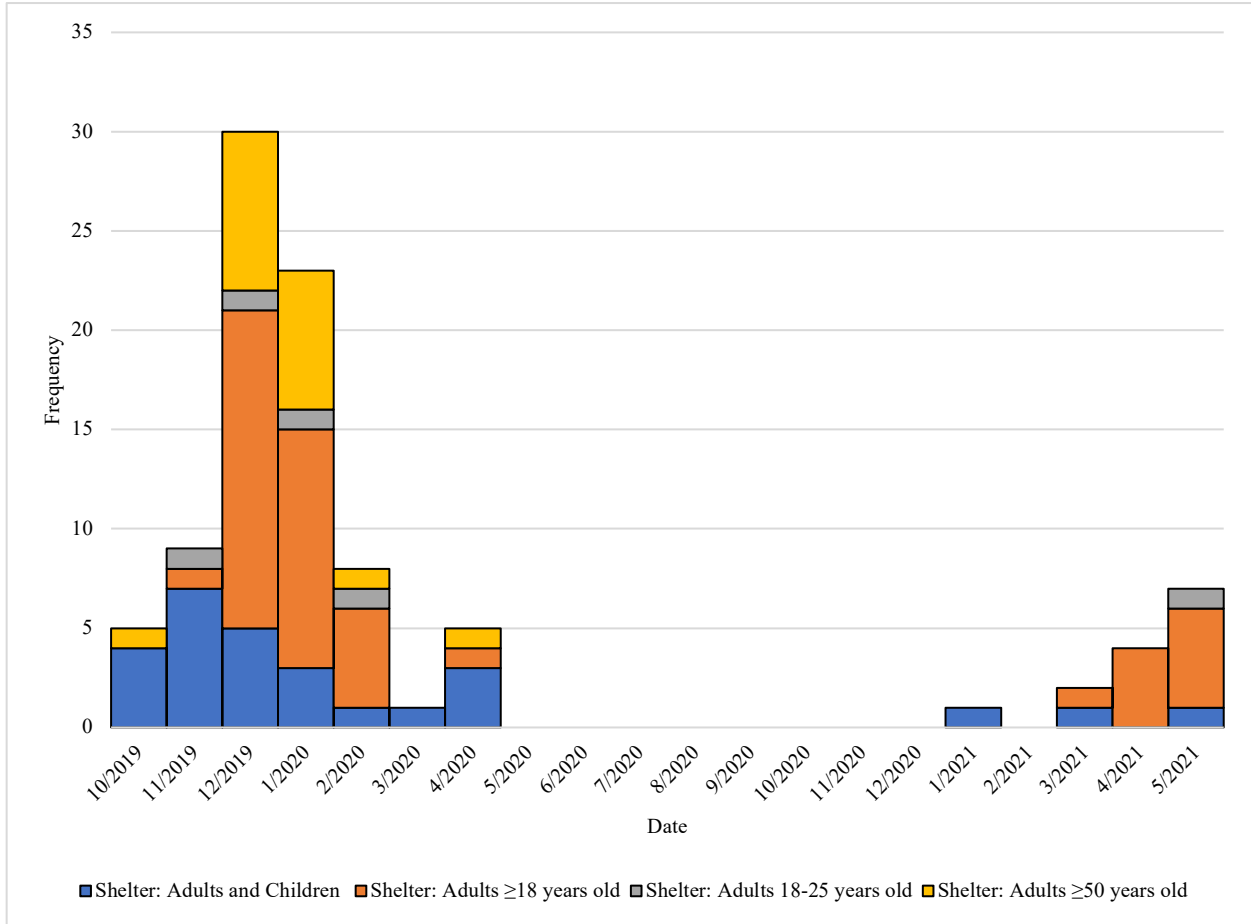

**Supplemental Figure 4: Phylogenetic Trees of Genomes from Shelter Samples and From GenBank by Seasonal Human Coronavirus Species**

**A)**

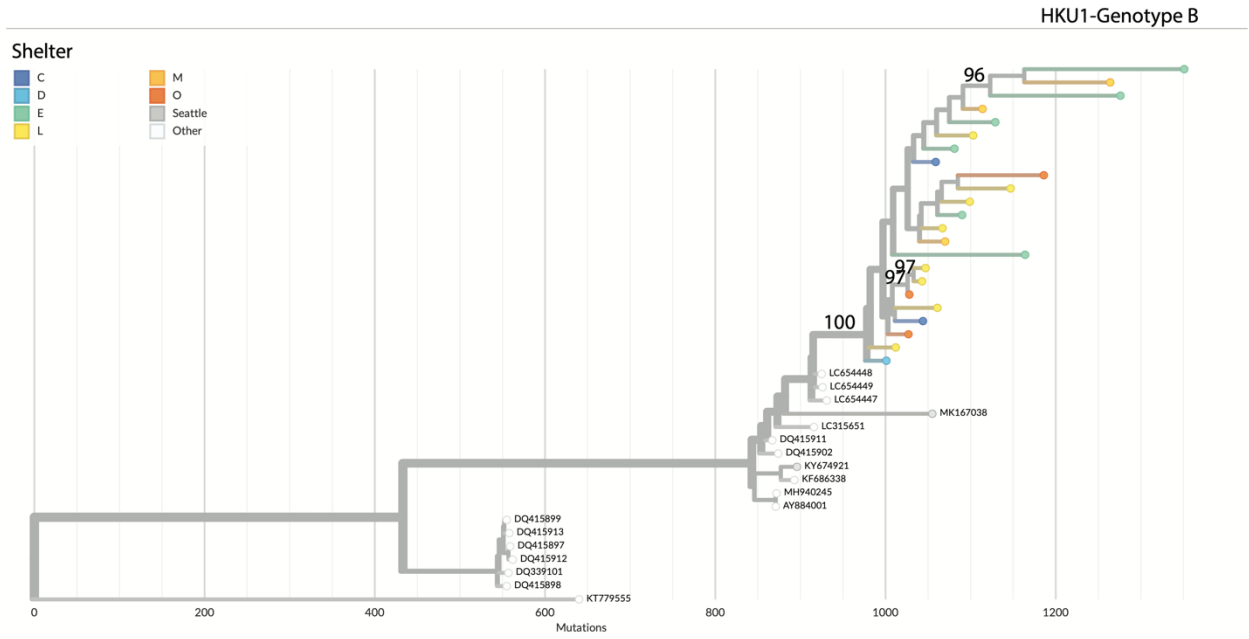

**B)**

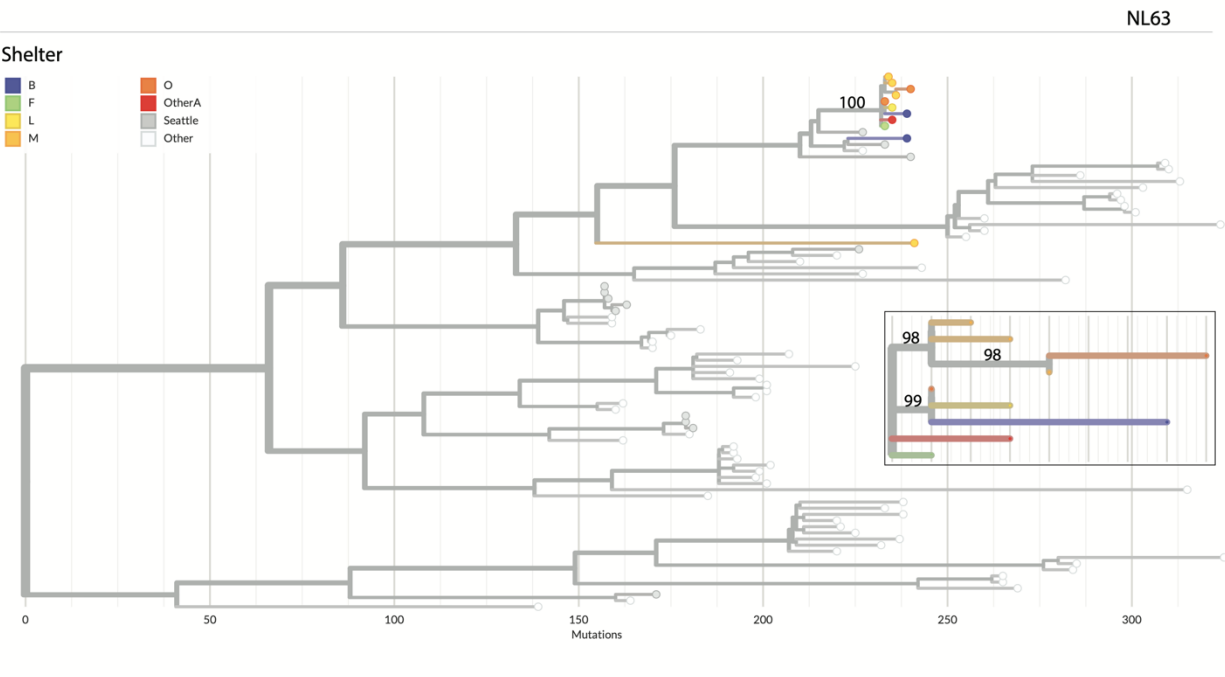

C)

HKU1-Genotype A

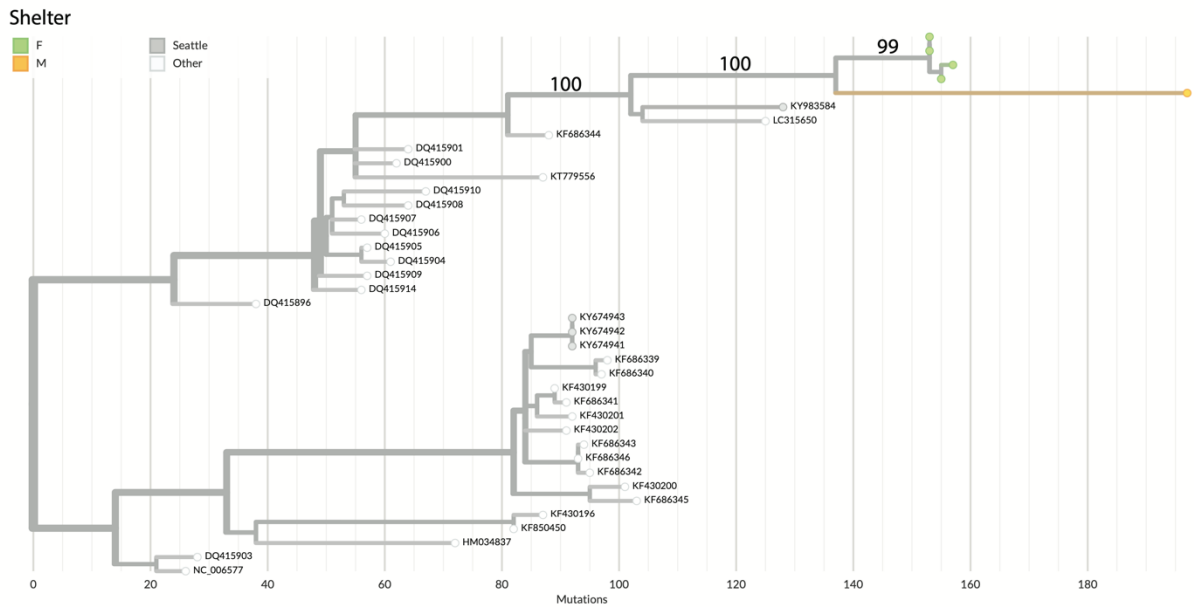

D)

OC43

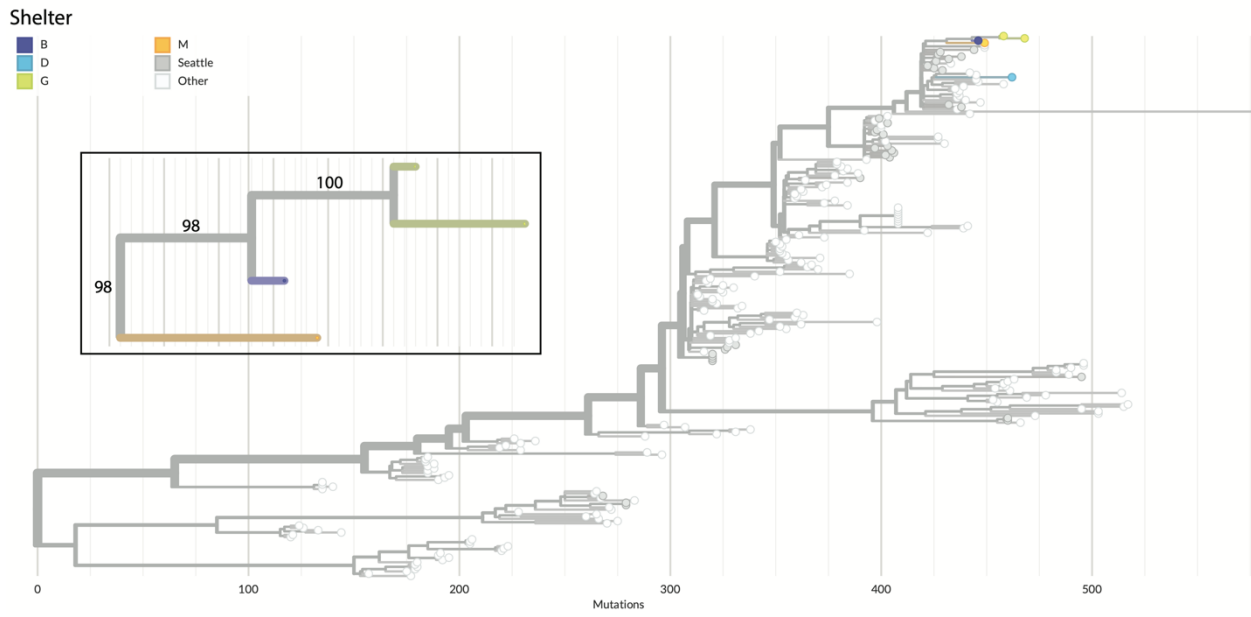

E)

229E

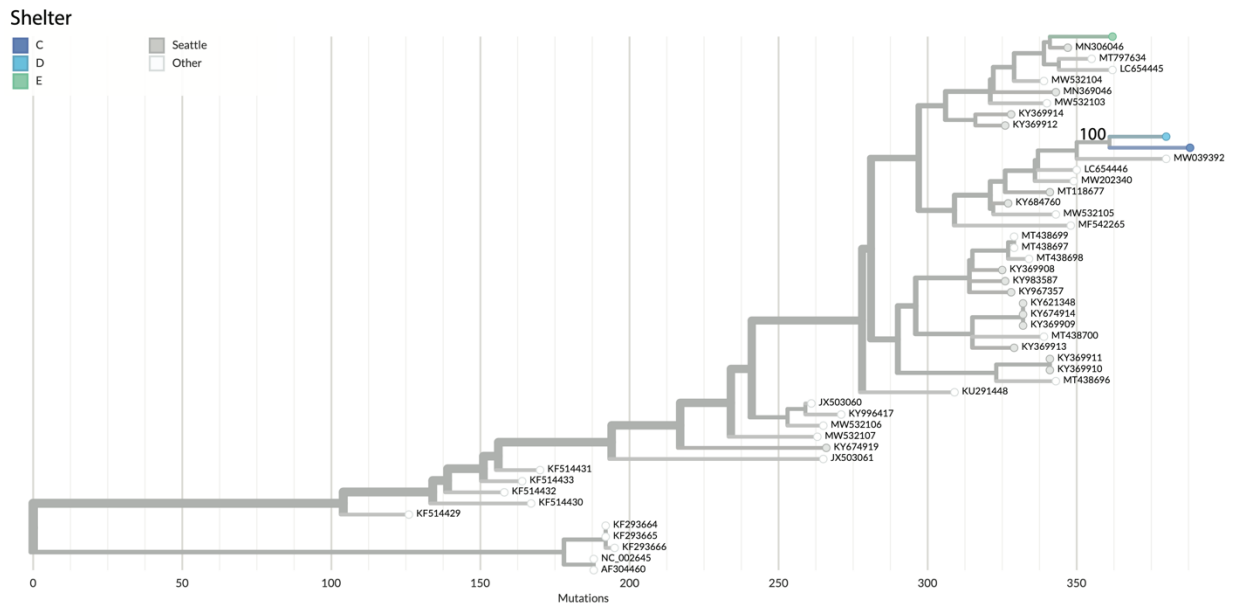



## Supplemental Methods

### Study Design and Population

This study was a secondary analysis of cross-sectional data from a previously described cluster randomized control trial of influenza testing and treatment and a subsequent SARS-CoV-2 surveillance study in homeless shelter within the Seattle-King County, Washington area from October 2019-May 2021.<sup>1,2</sup> The influenza testing and treatment trial was a stepped-wedge cluster-randomized design clustered by homeless shelter (RCT) conducted between October 2019-March 2020 and October 2020-March 2021. Shelter residents aged  $\geq 3$  months with acute respiratory illness (ARI) symptoms onset within the last seven days were eligible for the study. ARI symptoms were defined as cough or at least two of the following symptoms: subjective fever, headache, sore throat, runny or stuffy nose, shortness of breath, and muscle or body aches; for participants aged  $< 18$  years, diarrhoea, rash and ear pain or discharge were included as well. Participants in the RCT study were screened and self-enrolled from staffed kiosks within each shelter site six days per week during these time periods. Individuals meeting these requirements, or their parent or guardian were electronically consented and filled out a questionnaire. A mid-turbinate nasal swab sample was obtained and sent for respiratory viral testing. A subsequent questionnaire and nasal swab were collected in the intervention arm at day 2 or 3 and at day 5, 6 or 7 after diagnosis and antiviral treatment. Once a month, shelter wide surveillance occurred when asymptomatic and minimally symptomatic individuals were enrolled.

Due to public health response to the SARS-CoV-2 spread in King County, the first year of the influenza trial intervention study ended early on April 1, 2020, and was replaced with an active surveillance study investigating SARS-CoV-2 epidemiology in homeless shelters. On-site recruitment was reduced to three days per week at each shelter when RCT study activities were not on-going (April 1, 2020-September 30, 2020, and April 1, 2021-May 31, 2021). Recruitment was opened to both shelter staff and residents aged  $\geq 3$  months regardless of symptoms from April 1, 2020, onwards. Individuals were limited to once weekly participation in the study unless new or worsening symptoms developed. Participants were not followed longitudinally but were permitted to enrol more than one time. In addition to routine surveillance where participants were recruited from staffed kiosks, one-day surge testing events were implemented with Public Health — Seattle & King County beginning March 30, 2020, as part of contact tracing efforts in shelter sites where cases of SARS-CoV-2 were detected. During surge testing events, testing was offered to all residents and shelter staff regardless of symptoms.

Prior to participation in the study, consent was required for individuals aged  $\geq 18$  years or from a guardian for those aged  $< 18$  years. Participants aged 13-17 years also provided written assent to enrol in the study. Multiple encounters from unique participants were linked together by name and birthdate. Data were de-identified prior to the preparation of this manuscript. Our study was approved by the University of Washington Institutional Review Board (Study 00007800) and was prepared using the Strengthening the Reporting of Observational Studies in Epidemiology (STROBE) reporting guidelines.

### *Questionnaire and Shelter Site Data*

Participants completed a sociodemographic and illness questionnaire at the time of nasal swab collection. Study staff and telephonic interpreters were available for assistance when needed. The questionnaire was administered on a tablet and data were stored on Research Electronic Data Capture (REDCap). Self-reported data collected included shelter site location, birthdate, sex, race and ethnicity, pregnancy status, and current tobacco and e-cigarette use status. Participants were asked if they had underlying medical conditions including neurological disease, cardiovascular disease, asthma, bronchitis, chronic obstructive pulmonary disease (COPD), hepatic disease, diabetes mellitus, immunosuppression, cancer or another condition not listed. The questionnaire also included self-reported symptoms associated with their illness course: runny nose or congestion, cough, sore throat, fatigue, myalgias, headaches, subjective fevers, shortness of breath, sweats, nausea or vomiting, chills, diarrhoea, rash, and ear pain or discharge. Loss of sense of taste or smell was added after April 1, 2020. On site study staff guided participants through symptom screening and the enrolment survey. Asymptomatic infection was defined as anyone not reporting any of the aforementioned symptoms up to the time of enrolment. Shelter facility specifics, including maximum resident capacity, available sleeping arrangements and targeted resident demographics that the shelter served were shared directly with the research team by shelter management.

### *Specimen Collection and Respiratory Viral Testing*

Samples were initially obtained by mid-turbinate sterile nylon flocked swabs (Copan Diagnostics) by study staff from October 2019-July 22, 2020, and then subsequently from November 1, 2020-May 31, 2021. Anterior nares swabs were used from July 22, 2020-November 1, 2020, due to supply chain resource limitations. With the spread of SARS-CoV-2, sample collection was changed to a study staff supervised self-collected swabs. Comparability of a self-collected mid-turbinate swab to clinician-obtained nasopharyngeal sample has previously been described. Samples were stored at 4°C in universal transport media. Samples were purified for total nucleic acids using the Roche MagnaPure 96 DNA and viral NA small volume kit, Viral NA Universal SV 4.0 protocol (200µ input, 50µ elution) and tested by RT-PCR for multiple viral pathogens using a custom arrayed platform including: influenza (A, B and C), respiratory syncytial virus (A and B), human parainfluenza virus (1-4), HCoV, metapneumovirus, rhinovirus, enterovirus, human bocavirus, human parechovirus and adenovirus. Beginning November 23, 2020, the OpenArray platform identified HCoV by species including HCoV-HKU1, HCoV-NL63, HCoV-229E and HCoV-OC43. Beginning February 25, 2020, samples were tested for SARS-CoV-2 in real-time by a multiplexed RT-PCR assay targeting SARS-CoV-2 Orf1b and human RNase P genes in samples collected through March 18, 2020, and a multiplexed RT-PCR assay targeting SARS-CoV-2 Orf1b and S genes with FAM Fluor and the human RNase P gene with VIC or HEX fluor from March 19, 2020, onward. Specimens collected from January 1, 2020-February 24, 2020, were tested retrospectively using a single replicate Orf1b and RNase P multiplexed RT-PCR research assay to detect SARS-CoV-2 Orf1b. An OpenArray relative cycle threshold (Crt) value was calculated for virus-positive samples.

### *Genomic Sequencing and Analysis*

We attempted genomic sequencing on HCoV-positive samples with Crt values <22. RNA was extracted from samples using the Roche MagnaPure 96 DNA and viral NA small volume kit, Viral NA Universal SV 4.0 protocol (200µ input, 50µ elution). Shotgun metagenomic sequencing libraries were prepared as previously described.<sup>3,4</sup> Briefly, RNA was DNase treated using the Turbo DNA-Free kit (Thermo Fisher). First-strand cDNA was synthesized using Superscript IV (Thermo Fisher) and random hexamers (Integrated DNA Technologies), and second-strand synthesis was performed with Sequenase version 2.0 DNA polymerase (Thermo Fisher). The resulting double-stranded cDNA was purified using AMPure XP beads (Beckman Coulter). Libraries were constructed using the Nextera DNA Flex pre-enrichment kit (Illumina) and cleaned using 0.8 volumes of AMPure XP beads. For samples where genomes could not be recovered using shotgun sequencing, we performed hybridization capture using biotinylated oligonucleotide probes (Integrated DNA Technologies). The resulting libraries in both cases were sequenced on an Illumina NextSeq 2000 using a 1x100 read format.

Raw reads were assembled into consensus genomes using the Seattle Flu Study assembly pipeline (<https://github.com/seattleflu/assembly>). Briefly, low quality bases and adapter sequences are trimmed from the ends of raw reads and short reads are removed. Processed reads are then mapped to reference genomes representing the four HCoV species (HCoV-OC43 GenBank KU131570.1, HCoV-NL63 NC\_005831.2, HCoV-229E NC\_002645.1, HCoV-HKU1 NC\_006577.2). SNPs are called from these alignment files and are applied to the reference genomes to generate four consensus genomes for each sample. The consensus genome with the least missing data (lowest percent Ns) for each sample was selected for inclusion in further analyses. Sequences were uploaded to GenBank (Supplemental Table 3).

Among samples with completed genome sequencing, one genome per HCoV species from each unique participant were used to exclude multiple specimens from the same illness course. Maximum likelihood phylogenetic trees were constructed for each HCoV species (with separate trees for HCoV-HKU1A and HCoV-HKU1B) that included the shelter genomes and all full length (>25,000bp) genomes available in GenBank (Supplemental Figure 2). Shelter genomes for each HCoV species were then compared to assess clustering by shelter site (Supplemental Table 1) and time of sample collection. Genomic sequences collected before the pandemic (April 2020 and earlier) and during the pandemic (January 2021 and later) were compared.

### *Seasonal Human Coronavirus Species Identification*

For samples that underwent genomic sequencing, the reference genome associated with the highest quality consensus genome was presumed to represent the sample's species. These prospective species assignments were confirmed by creating a maximum likelihood phylogenetic tree including all sample genomes and the four reference genomes. All other samples had species determination by multiplex RT-PCR or were sent for species-specific primer PCR amplification. HCoV species were confirmed using type-specific FAM fluor assays from ThermoFisher: Vi06439674\_s1 (HKU1); Vi06439673\_s1 (NL63); Vi06439671\_s1 (HK229EU1); and

Vi06439646\_s1 (OC43). PCR reactions used AgPath-ID One-Step RT-PCR kit, with 17.5µl buffer, 1.4µl enzyme, 1.5µl assay mix, and 5µl template RNA per 30µl reaction. All amplifications were carried out in ABI 7500 thermocyclers, and results were analysed with thresholds set to 0.1 and baselines set to 3-15.

## References

1. Newman KL, Rogers JH, McCulloch D, et al. Point-of-care molecular testing and antiviral treatment of influenza in residents of homeless shelters in Seattle, WA: study protocol for a stepped-wedge cluster-randomized controlled trial. *Trials* 2020; **21**(1): 956.
2. Rogers JH, Link AC, McCulloch D, et al. Characteristics of COVID-19 in Homeless Shelters : A Community-Based Surveillance Study. *Ann Intern Med* 2021; **174**(1): 42-9.
3. Peddu V, Shean RC, Xie H, et al. Metagenomic Analysis Reveals Clinical SARS-CoV-2 Infection and Bacterial or Viral Superinfection and Colonization. *Clin Chem* 2020; **66**(7): 966-72.
4. Greninger AL, Zerr DM, Qin X, et al. Rapid Metagenomic Next-Generation Sequencing during an Investigation of Hospital-Acquired Human Parainfluenza Virus 3 Infections. *J Clin Microbiol* 2017; **55**(1): 177-82.
